# Supplementary material
Source: PubMed Central journal article supplement (PMC6742770)
Supplement: IMM-158-136-s001.pdf [file IMM-158-136-s001.pdf]

# Supplementary figure 1

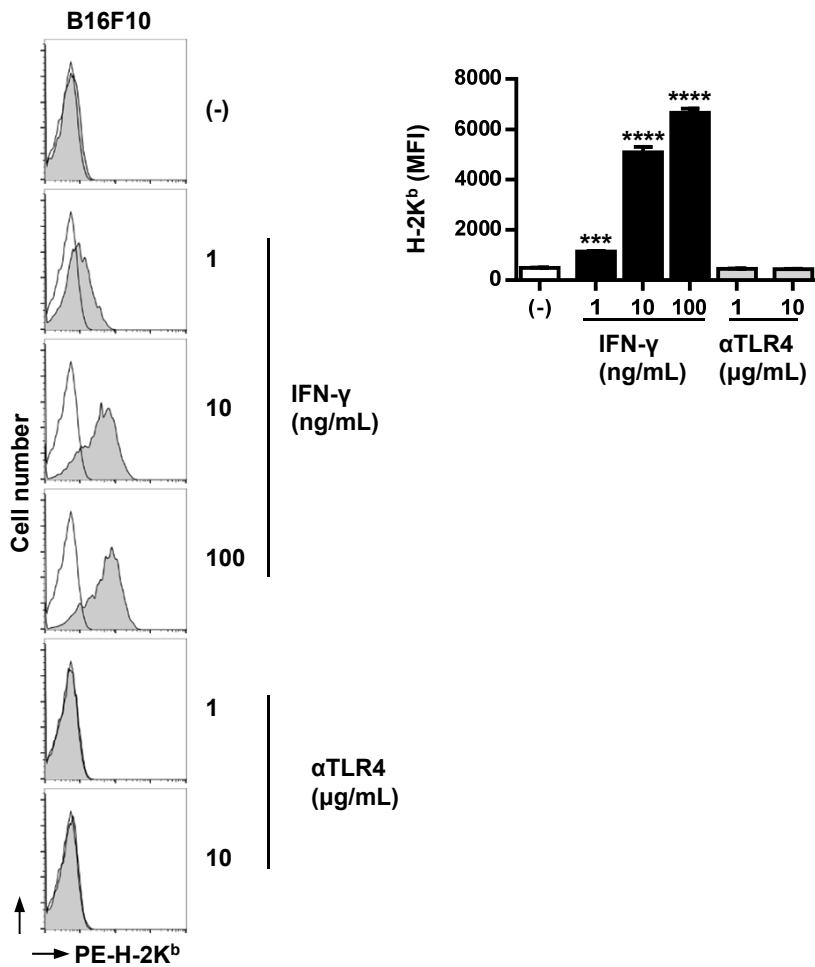

## Supplementary Figure 1

B16F10 cells ( $5 \times 10^4$ ) were cultured on 48-well plates overnight in 500  $\mu$ L culture medium and stimulated with the anti-TLR4 mAb or IFN- $\gamma$  for 24 h. The cells were harvested in PBS containing 1 mM EDTA, stained with a PE-conjugated anti-H-2K<sup>b</sup> mAb, and analyzed by FACS. Open histograms indicate staining without anti-H-2K<sup>b</sup> mAb. Fluorescence intensity is expressed as the mean  $\pm$  SD of triplicate cultures. One-way ANOVA with the Tukey *post hoc* test; \*\*\*P < 0.001, \*\*\*\*P < 0.0001 (*vs.* control). Similar results were obtained from two independent experiments.
